# Supplementary material
Source: bioRxiv or medRxiv preprint supplement (https://www.biorxiv.org/highwire/filestream/29555/field_highwire_adjunct_files/0/103754-1.pdf)
Supplement: Supplementary file [file 103754-1.pdf]

## 1 **Electronic Supplementary Material**

2 Gawryszewski FM (2017) Colour vision models: a practical guide, some simulations, and *colourvision*  
3 R package.

### 5 **1. Methods for tetrachromatic colour vision models**

#### 6 *1.1. Colour hexagon model for tetrachromats*

7 The tetrachromat version of Chittka (1992) colour hexagon was derived by They & Casas (2002).  
8 The photoreceptor outputs are calculated in the same way as the trichromatic version (main text  
9 eqn. 1-4). Then, these values are projected into a tridimensional colour space, a hexagonal  
10 trapezohedron, by the following formulae:

$$x = \frac{\sqrt{2}\sqrt{3}}{3}(E_3 - E_4) \quad (\text{Eq. S1})$$

$$y = E_1 - \frac{1}{3}(E_2 + E_3 + E_4) \quad (\text{Eq. S2})$$

$$z = \frac{2\sqrt{2}}{3} \left[ \frac{1}{2}(E_3 + E_4) - E_2 \right] \quad (\text{Eq. S1})$$

#### 15 *1.2. Endler and Mielke (2005) model*

16 Model calculation follow the same steps as in the trichromatic version, but with four photoreceptor  
17 outputs. Then,  $f_i$  is transformed so that photoreceptor outputs  $u + s + m + l = 1$ :

$$u = \frac{f_1}{f_1 + f_2 + f_3 + f_4} \quad (\text{Eq. S4})$$

$$s = \frac{f_2}{f_1 + f_2 + f_3 + f_4} \quad (\text{Eq. S5})$$

$$m = \frac{f_3}{f_1 + f_2 + f_3 + f_4} \quad (\text{Eq. S6})$$

$$l = \frac{f_4}{f_1 + f_2 + f_3 + f_4} \quad (\text{Eq. S7})$$

21 Photoreceptor outputs are then used to project a tridimensional colour space (tetrahedron) by the  
 22 following formulae:

$$x = \sqrt{\frac{3}{2}} \left( \frac{1 - 2s - m - u}{2} \right) \quad (\text{Eq. S8})$$

23

$$y = \frac{-1 + 3m + u}{2\sqrt{2}} \quad (\text{Eq. S9})$$

24

$$z = u - \frac{1}{4} \quad (\text{Eq. S10})$$

25

### 26 *1.3. Receptor noise limited models: linear and log-linear versions*

27 For linear-RNL and log-RNL models, photoreceptor outputs and photoreceptor noise of each  
 28 photoreceptor type are used to find colour locus in the chromaticity diagram using the following  
 29 formulae (Renoult et al. 2017):

30

$$A = \sqrt{\frac{(e_3 e_4)^2 + (e_2 e_4)^2 + (e_2 e_3)^2}{(e_2 e_3 e_4)^2 + (e_1 e_3 e_4)^2 + (e_1 e_2 e_4)^2 + (e_1 e_2 e_3)^2}} \quad (\text{Eq. S11})$$

31

$$a = \frac{(e_2 e_3)^2}{(e_3 e_4)^2 + (e_2 e_3)^2 + (e_2 e_4)^2} \quad (\text{Eq. S12})$$

32

$$b = \frac{(e_2 e_4)^2}{(e_3 e_4)^2 + (e_2 e_3)^2 + (e_2 e_4)^2} \quad (\text{Eq. S13})$$

$$c = \frac{(e_3 e_4)^2}{(e_3 e_4)^2 + (e_2 e_3)^2 + (e_2 e_4)^2} \quad (\text{Eq. S14})$$

33

$$x = \sqrt{\frac{1}{e_3^2 + e_4^2}}(f_4 - f_3) \quad (\text{Eq. S15})$$

34

$$y = \sqrt{\frac{e_3^2 + e_4^2}{(e_3e_4)^2 + (e_2e_3)^2 + (e_2e_4)^2}} \left[ f_2 - \left( f_4 \frac{e_3^2}{e_3^2 + e_4^2} + f_3 \frac{e_4^2}{e_3^2 + e_4^2} \right) \right] \quad (\text{Eq. S16})$$

35

$$z = A[f_1 - (af_4 + bf_3 + cf_2)] \quad (\text{Eq. S17})$$

36

37

#### 38 1.4. Distance between colour loci

39 Chromaticity distance between pair of reflectance spectra ( $a$  and  $b$ ) are found by calculating the  
40 Euclidian distance between their colour loci in the colour space:

41

$$\Delta S = \sqrt{(x_a - x_b)^2 + (y_a - y_b)^2 + (z_a - z_b)^2} \quad (\text{Eq. S18})$$

42

43 By definition background reflectance lays at the centre of the background ( $x = 0, y = 0$ ).  
44 Therefore, the distance of the observed object against the background is given by:

45

$$\Delta S = \sqrt{x^2 + y^2 + z^2} \quad (\text{Eq. S19})$$

46

47 In the original noise receptor model (Vorobyev and Osorio 1998)  $\Delta S$  between pair of reflectance  
48 spectra ( $a$  and  $b$ ) is calculated directly, without finding colour locus in the colour space:

49

$$\Delta S = \sqrt{\frac{(e_1e_2)^2(\Delta f_4 - \Delta f_3)^2 + (e_1e_3)^2(\Delta f_4 - \Delta f_2)^2 + (e_1e_4)^2(\Delta f_3 - \Delta f_2)^2 + (e_2e_3)^2(\Delta f_4 - \Delta f_1)^2 + (e_2e_4)^2(\Delta f_3 - \Delta f_1)^2 + (e_3e_4)^2(\Delta f_2 - \Delta f_1)^2}{(e_1e_2e_3)^2 + (e_1e_3e_4)^2 + (e_1e_3e_4)^2 + (e_2e_3e_4)^2}} \quad (\text{Eq. S20})$$

51

52 Where  $\Delta f_i$  is the difference between photoreceptor  $i$  output for the reflectance spectrum  $a$  and  $b$   
53 ( $\Delta f_i = f_{a_i} - f_{b_i}$ ). Using equation (S24) will give the same value as calculating  $\Delta S$  using equations

54 (S12-18) and then equation (S19).

55

56

## 57 **2. Simulations with tetrachromatic vision**

58 Model simulation parameters were the same as in the trichromatic simulation, except that instead  
59 of honeybee photoreceptors, I used the average photoreceptor sensitivity curves of birds (only birds  
60 with UV  $\lambda_{\max}$  cones; data from Hart & Vorobyev 2005 available in Endler & Mielke 2005; Figure  
61 S1). I estimated receptor noise using eqn. 21, with a ratio of 1:2:2:4 photoreceptor types in the  
62 retina (from shortest to longest lambda-max; *Leiothrix lutea*) and a noise-to-signal ratio of 0.1 (data  
63 available in Vorobyev & Osorio 1998; Vorobyev *et al.* 1998). Results are presented in Figures S4-  
64 S10.

65

66

## 67 **3. Simulations using Gaussian reflectance curves**

68 Model simulation parameters were the same as in the original simulations, except that instead of a  
69 logistic function, I used a Gaussian function to generate stimulus reflectance spectra:

$$R(\lambda) = ae^{-\frac{(\lambda-\lambda_p)^2}{2b^2}} \quad (\text{Eq. S17})$$

70 Where  $R$  is the reflectance value at wavelength  $\lambda$ ,  $a$  gives the curve maximum reflectance value  
71 (%),  $b$  controls the width of the curve, and  $\lambda_p$  is the wavelength (nm) of maximum reflectance. I  
72 used a maximum value of  $a = 50\%$  reflectance, and a width of  $b = 0.04$ . I generated curves with  
73 wavelength of maximum reflectance varying from 300 to 700 nm with 5 nm intervals, in a total of  
74 81 reflectance spectra (Figure S2 and S3). Results are presented in Figures S11-S14.

75

76

## 77 **4. References**

78 Endler, J.A. & Mielke, P. (2005). Comparing entire colour patterns as birds see them. *Biological*  
79 *Journal Of The Linnean Society*, **86**, 405–431.

80 Hart, N.S. & Vorobyev, M. (2005). Modelling oil droplet absorption spectra and spectral  
81 sensitivities of bird cone photoreceptors. *Journal of Comparative Physiology A: Sensory, Neural, and*  
82 *Behavioral Physiology*, **191**, 381–392.

83 Renoult, J.P., Kelber, A. & Schaefer, H.M. (2017). Colour spaces in ecology and evolutionary  
84 biology. *Biological Reviews Of The Cambridge Philosophical Society*, **92**, 292–315.

85 Thery, M. & Casas, J. (2002). Predator and prey views of spider camouflage. *Nature*, **415**, 133–133.

86 Vorobyev, M. & Osorio, D. (1998). Receptor noise as a determinant of colour thresholds. *Proceedings*  
87 *of the Royal Society B: Biological Sciences*, **265**, 351–358.

88 Vorobyev, M., Osorio, D., Bennett, A.T.D., Marshall, N.J. & Cuthill, I.C. (1998). Tetrachromacy,  
89 oil droplets and bird plumage colours. *Journal of Comparative Physiology A: Sensory, Neural, and*  
90 *Behavioral Physiology*, **183**, 621–633.

91

92 **5. Figures**

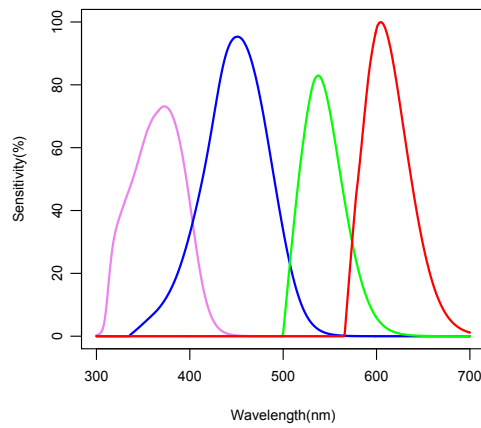

93

94 Figure S1. Average photoreceptor sensitivity curves of birds (only birds with UV  $\lambda_{\max}$  cones;  $\lambda_{\max}$   
95 of cones with oil droplets; data from Hart & Vorobyev 2005 available in Endler and Mielke  
96 2005; used for tetrachromatic model simulations.

97

98

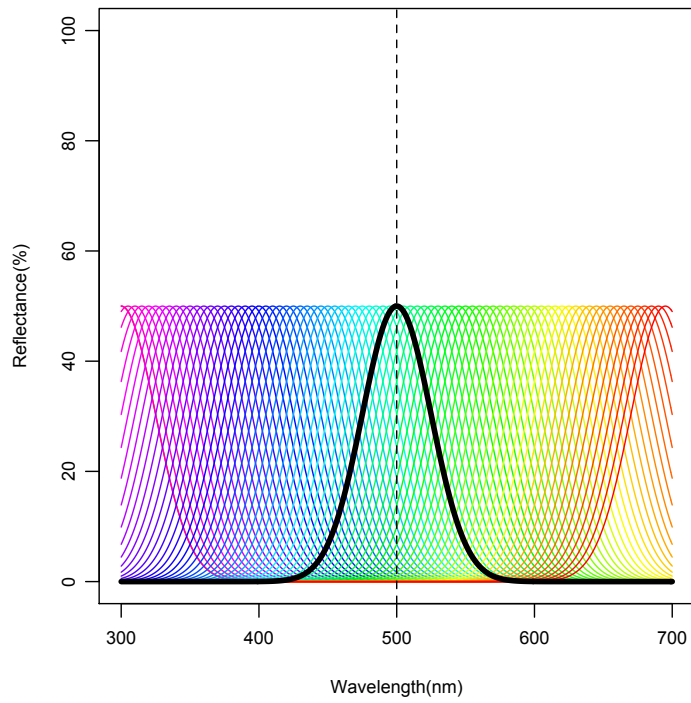

99

100 Figure S2. Reflectance spectra generated by a Gaussian function with wavelength of maximum  
101 reflectance varying from 300 to 700nm at 5nm intervals. Spectrum colours are arbitrary. In black  
102 is shown a reflectance curve with wavelength of maximum reflectance at 500nm.

103

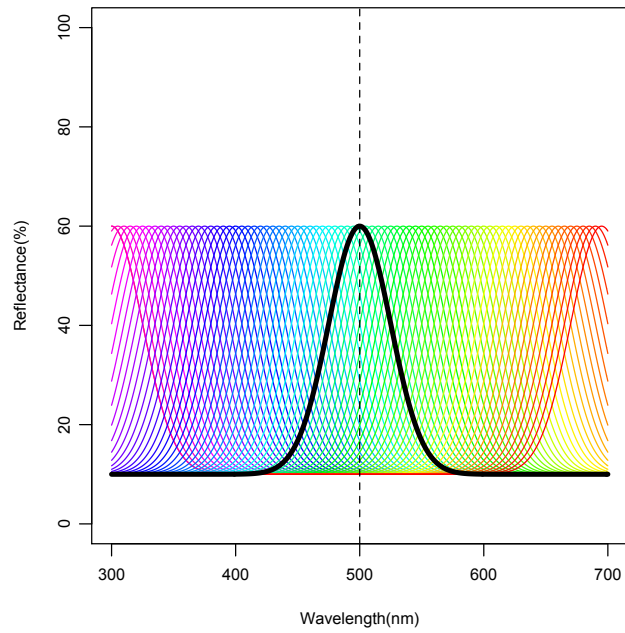

104

105 Figure S3. Ten percent point added to the reflectance spectra generated by a Gaussian function

106 (Figure S2). Spectrum colours are arbitrary. In black is shown a reflectance curve with

107 wavelength of maximum reflectance at 500nm.

108



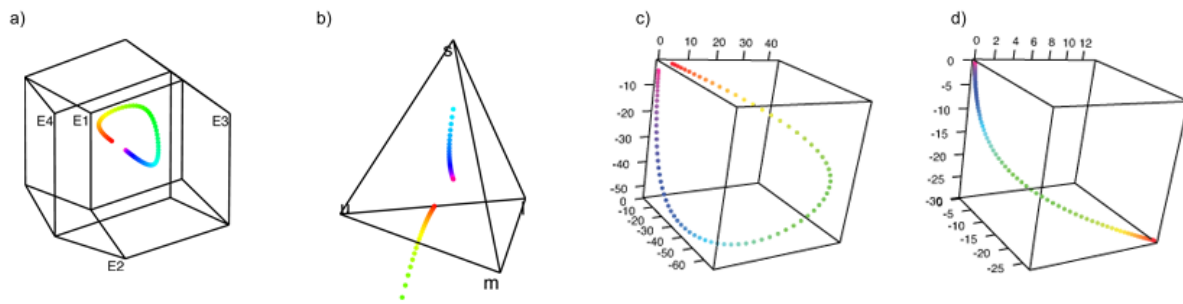

110

111 Figure S4. Chromaticity diagrams of the basic setup of colour vision model simulations: a)  
 112 Chittka (1992), b) Endler & Mielke (2005) model, and b) linear and c) log-linear Receptor Noise  
 113 Limited models (Linear-RNL and Log-RNL; Vorobyev & Osorio 1998; Vorobyev et al. 1998).  
 114 Colours correspond to reflectance spectra from Figure 1d (main text).

115

116

117

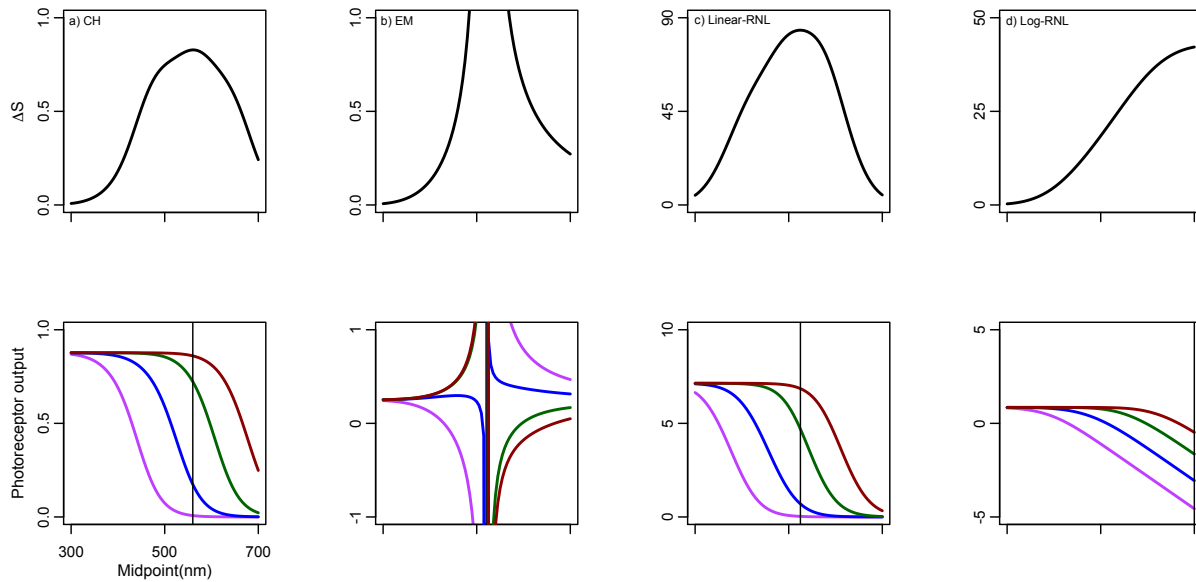

119

120

121 Figure S5.  $\Delta S$  and photoreceptor outputs of the basic setup of colour vision model simulations: a)  
 122 Chittka (1992); b) Endler & Mielke (2005), and b) linear and c) log-linear Receptor Noise Limited  
 123 models (Linear-RNL and Log-RNL; Vorobyev & Osorio 1998; Vorobyev *et al.* 1998). Variation  
 124 in  $\Delta S$ -values as a function of reflectance spectra with midpoints from 300 to 700nm (top row).  
 125 Photoreceptor output values as a function of the same reflectance spectra (bottom row). Violet,  
 126 blue, green, and red colours represent UV, short, middle and long  $\lambda_{max}$  photoreceptor types.  
 127 Vertical lines represent midpoint of maximum  $\Delta S$ -values.

128

129

130

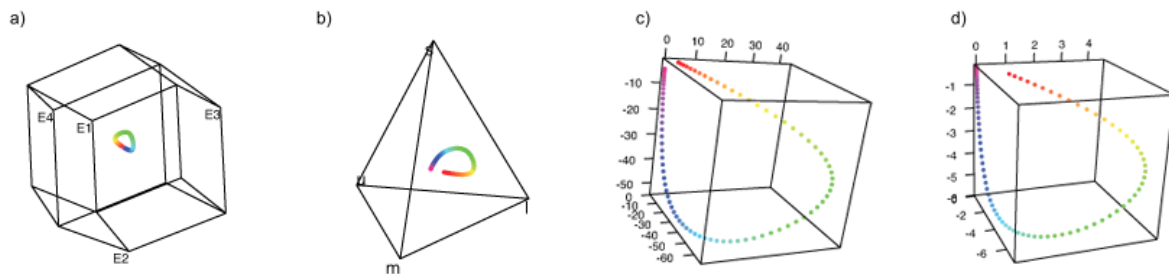

131

132 Figure S6. Chromaticity diagrams with 10 percent point added to reflectance values: a) Chittka  
133 (1992), b) Endler & Mielke (2005) model, and b) linear and c) log-linear Receptor Noise Limited  
134 models (Linear-RNL and Log-RNL; Vorobyev & Osorio 1998; Vorobyev et al. 1998). Colours  
135 correspond to reflectance spectra from Figure 2a (main text).

136

137

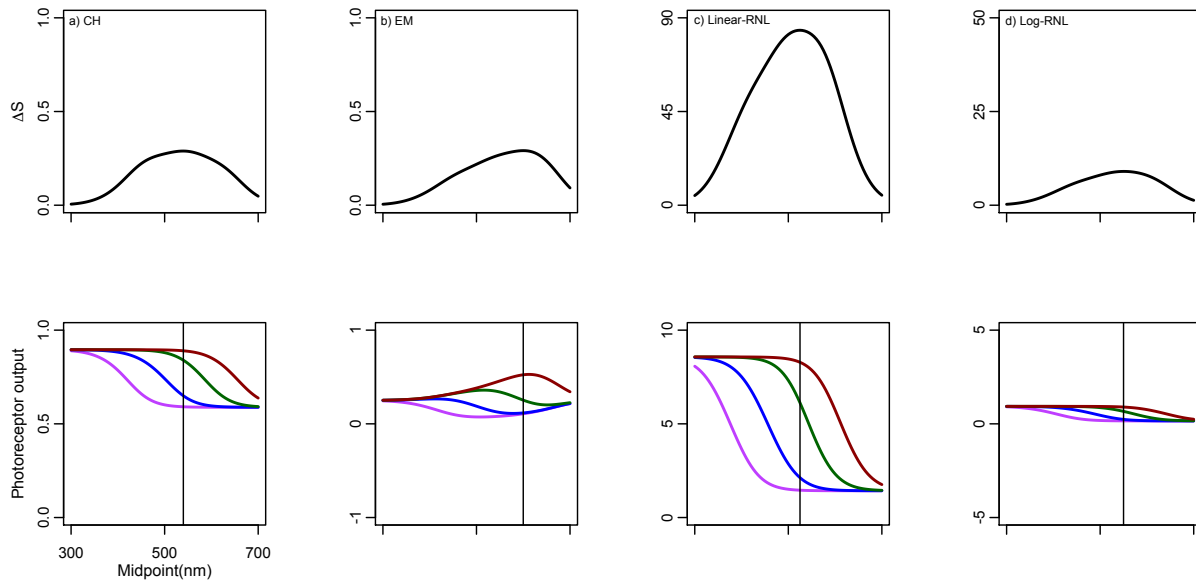

139

140

141 Figure S7.  $\Delta S$  and photoreceptor outputs of the second setup of colour vision model simulations -  
 142 10 percent point added to stimulus reflectance spectra: a) Chittka (1992); b) Endler & Mielke  
 143 (2005), and b) linear and c) log-linear Receptor Noise Limited models (Linear-RNL and Log-  
 144 RNL; Vorobyev & Osorio 1998; Vorobyev *et al.* 1998). Variation in  $\Delta S$ -values as a function of  
 145 reflectance spectra with midpoints from 300 to 700nm (top row). Photoreceptor output values as  
 146 a function of the same reflectance spectra (bottom row). Violet, blue, green, and red colours  
 147 represent UV, short, middle and long  $\lambda_{\max}$  photoreceptor types. Vertical lines represent midpoint  
 148 of maximum  $\Delta S$ -values. For comparison, scales are the same as in Figure S5.

149

150

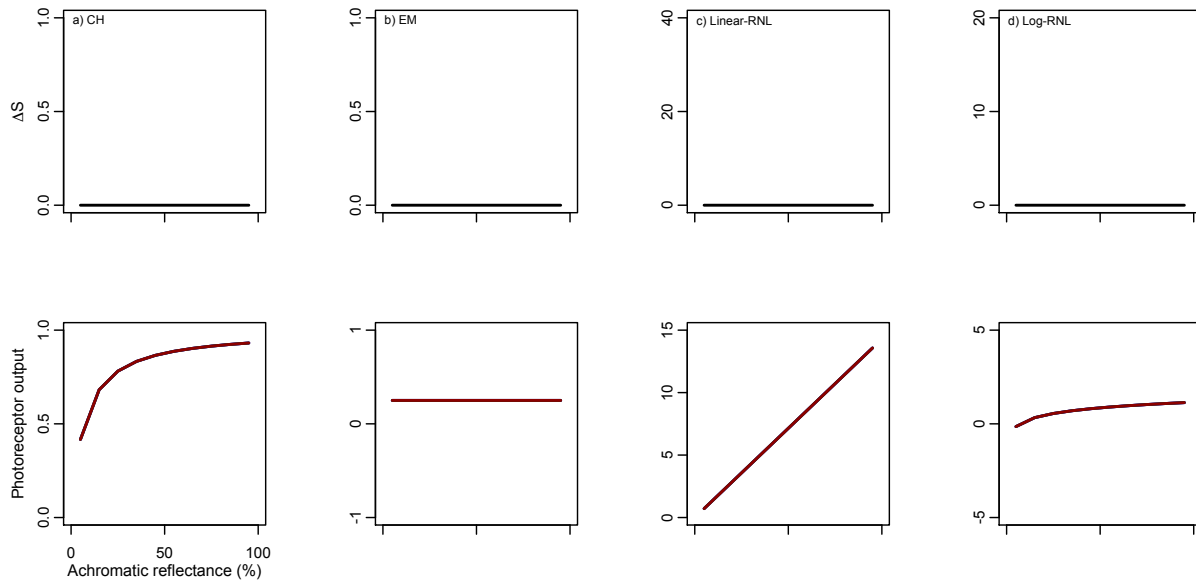

152

153

154 Figure S8.  $\Delta S$  and photoreceptor outputs of the third setup of colour vision model simulations –  
 155 achromatic stimulus against achromatic background: c) Chittka (1992), b) Endler & Mielke  
 156 (2005), and b) linear and c) log-linear Receptor Noise Limited models (Linear-RNL and Log-  
 157 RNL; Vorobyev & Osorio 1998; Vorobyev *et al.* 1998). Variation in  $\Delta S$ -values as a function of  
 158 spectra with achromatic reflectance from 5% to 95% (top row). Photoreceptor output values as a  
 159 function of the same reflectance spectra (bottom row). Photoreceptors are colour coded by their  
 160  $\lambda_{\max}$  photoreceptor, however they do not appear because are all superimposed. With the  
 161 exception of c) Linear-RNL, scales are the same as in Figure S5.

162

163

164

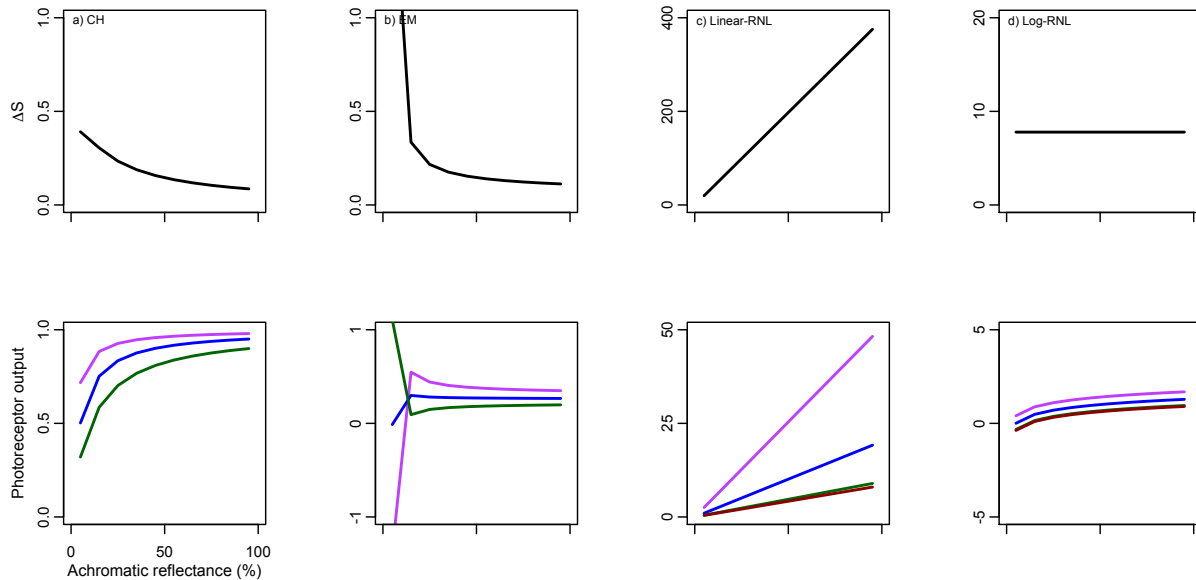

166

167

168 Figure S9.  $\Delta S$  and photoreceptor outputs of the fourth setup of colour vision model simulations –  
 169 achromatic stimulus against chromatic background: a) Chittka (1992), b) Endler & Mielke (2005),  
 170 and c) linear and d) log-linear Receptor Noise Limited models (Linear-RNL and Log-RNL;  
 171 Vorobyev & Osorio 1998; Vorobyev *et al.* 1998). Variation in  $\Delta S$ -values as a function of spectra  
 172 with achromatic reflectance from 5% to 95% (top row). Photoreceptor output values as a  
 173 function of the same reflectance spectra (bottom row). Violet, blue, green and red colours  
 174 represent UV, short, middle and long  $\lambda_{\max}$  photoreceptor types. With the exception of c) Linear-  
 175 RNL, scales are the same as in Figure S5.

176

177

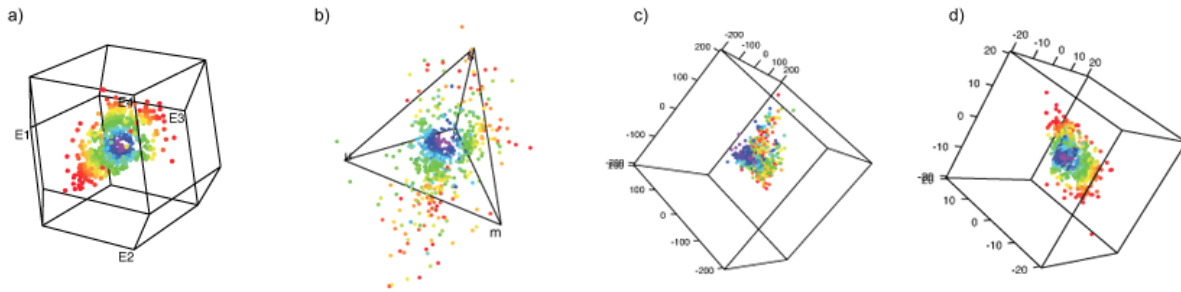

179

180 Figure S10. Flower reflectance spectra (N=858) projected into chromaticity diagrams: a) Chittka  
 181 (1992), b) Endler & Mielke (2005), and c) linear and d) log-linear Receptor Noise Limited models  
 182 (Linear-RNL and Log-RNL; Vorobyev & Osorio 1998; Vorobyev *et al.* 1998). To facilitate model  
 183 comparison, point colours correspond to chromaticity distances in the CH chromaticity diagram.

184

185

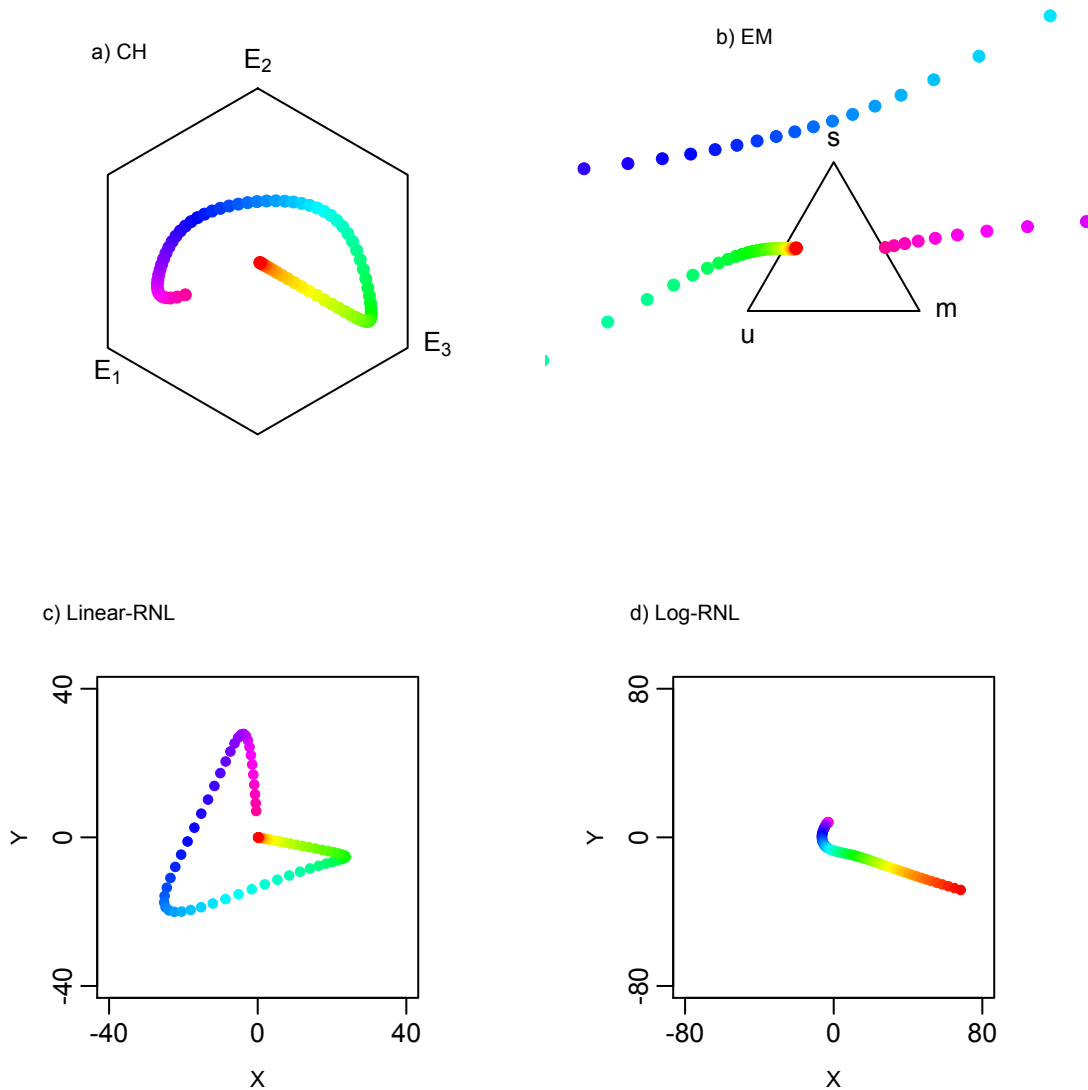

187

188 Figure S11. Chromaticity diagrams of the basic setup of colour vision model simulations with  
 189 Gaussian reflectance spectra: Chittka (1992) colour hexagon (CH), Endler & Mielke (2005)  
 190 colour triangle (EM), and linear and log-linear Receptor Noise Limited models (Linear-RNL and  
 191 Log-RNL; Vorobyev & Osorio 1998; Vorobyev et al. 1998). Colours correspond to reflectance  
 192 spectra from Figure S2.

193

194



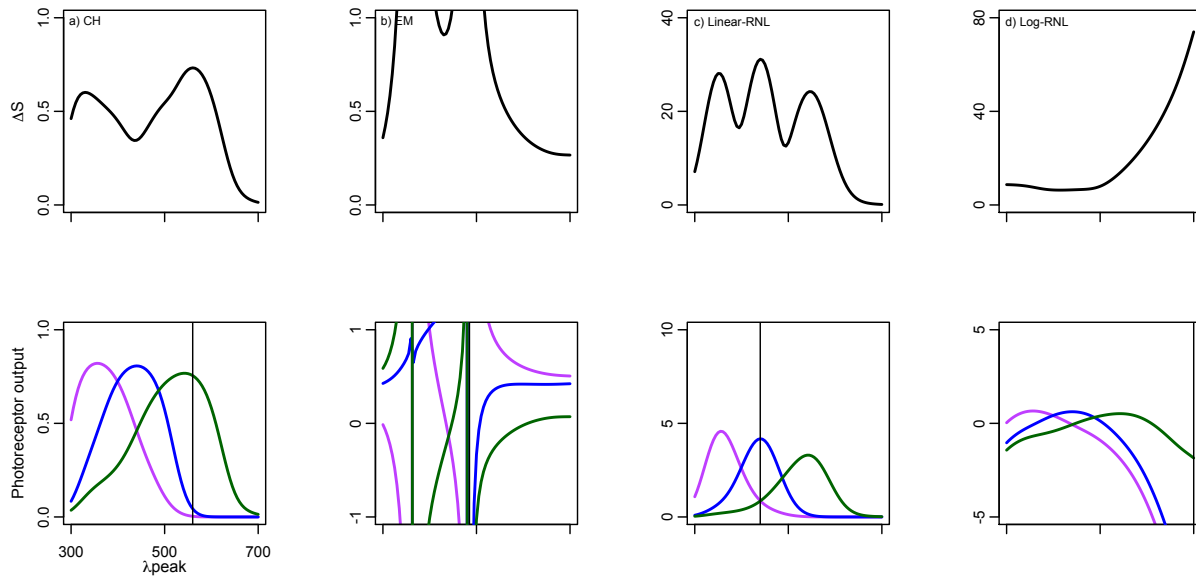

196

197

198 Figure S12.  $\Delta S$  and photoreceptor outputs of the basic setup of colour vision model simulations  
 199 with Gaussian reflectance curves (Figure S2): Chittka (1992) colour hexagon (CH), Endler &  
 200 Mielke (2005) colour triangle (EM), and linear and log-linear Receptor Noise Limited models  
 201 (Linear-RNL and Log-RNL; Vorobyev & Osorio 1998; Vorobyev *et al.* 1998). Variation in  $\Delta S$ -  
 202 values as a function of wavelength of maximum reflectance ( $\lambda_{\text{peak}}$ ) from 300 to 700nm (top row).  
 203 Photoreceptor output values as a function of the same reflectance spectra (bottom row). Violet,  
 204 blue and green colours represent short, middle and long  $\lambda_{\text{max}}$  photoreceptor types. Vertical lines  
 205 represent midpoint of maximum  $\Delta S$ -values.

206

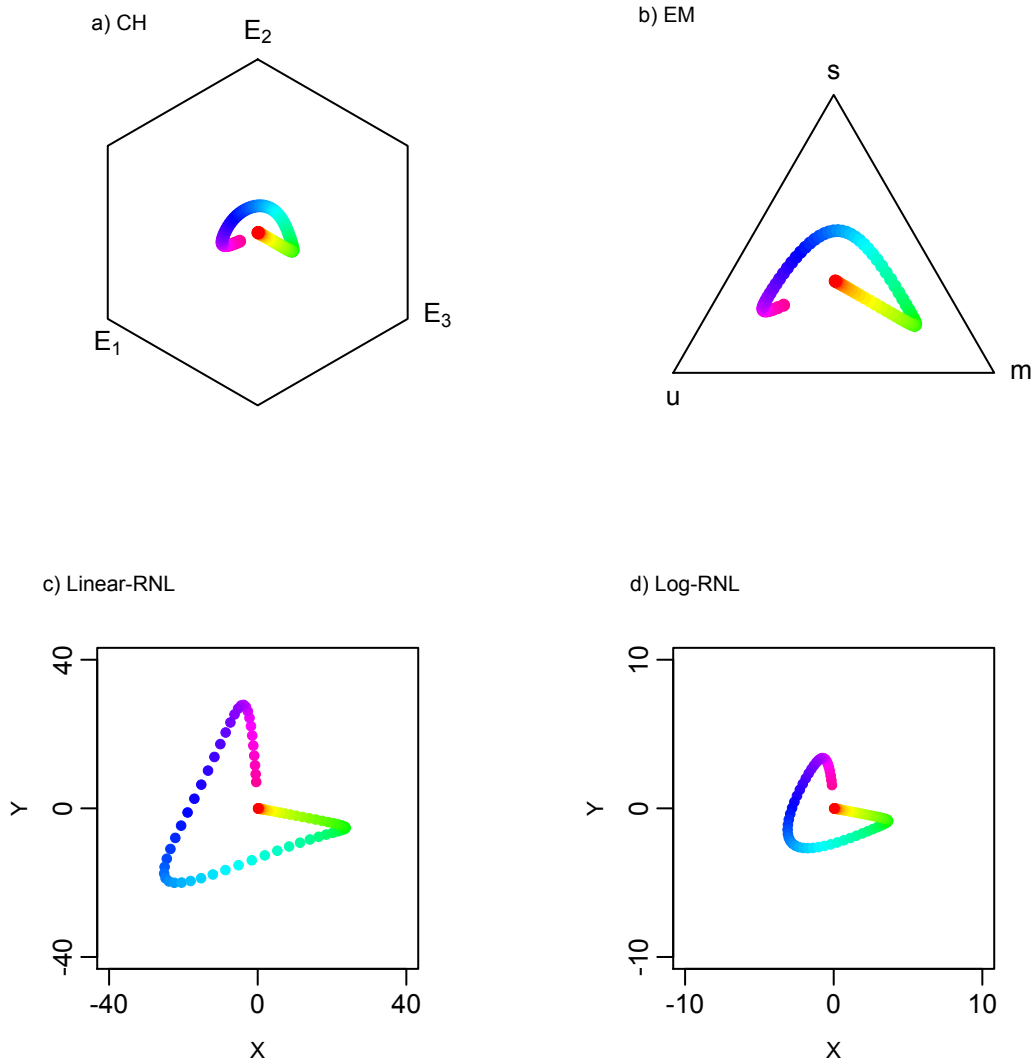

208

209 Figure S13. Chromaticity diagrams of the second simulation – 10 percent point added to  
 210 reflectance values (Figure S3): Chittka (1992) colour hexagon (CH), Endler & Mielke (2005)  
 211 colour triangle (EM), and linear and log-linear Receptor Noise Limited models (Linear-RNL and  
 212 Log-RNL; Vorobyev & Osorio 1998; Vorobyev *et al.* 1998). Colours correspond to reflectance  
 213 spectra from Figure S3.

214

215

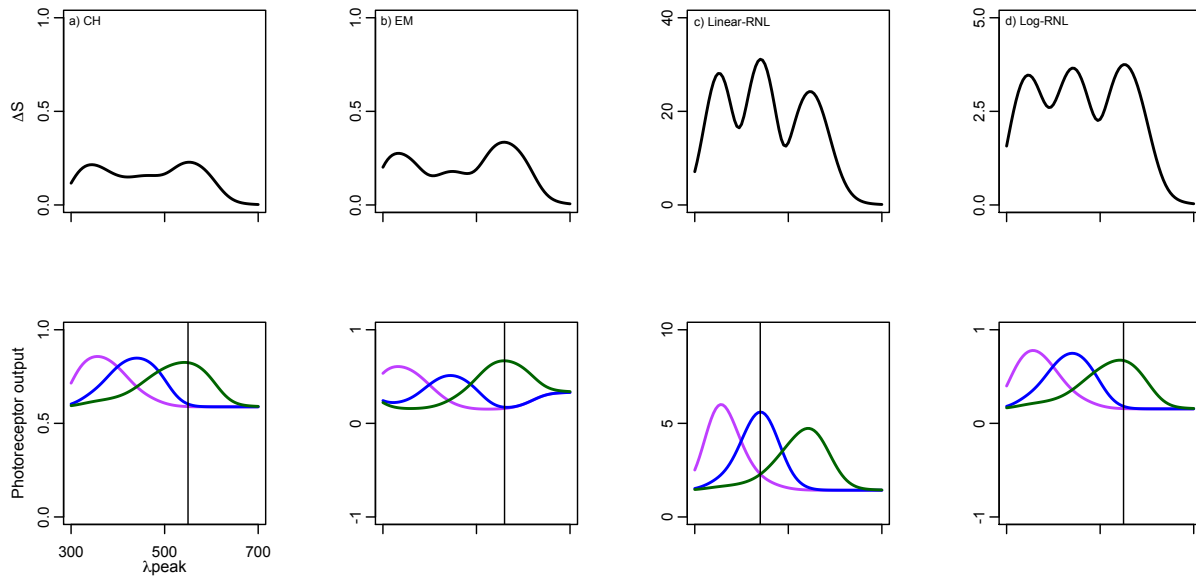

217

218

219 Figure 6.  $\Delta S$  and photoreceptor outputs of the second setup of colour vision model simulations -  
 220 10 percent point added to stimulus reflectance spectra (Figure S3): Chittka (1992) colour hexagon  
 221 (CH), Endler & Mielke (2005) colour triangle (EM), and linear and log-linear Receptor Noise  
 222 Limited models (Linear-RNL and Log-RNL; Vorobyev & Osorio 1998; Vorobyev *et al.* 1998).  
 223 Variation in  $\Delta S$ -values as a function of reflectance spectra with wavelength of maximum  
 224 reflectance ( $\lambda_{\text{peak}}$ ) from 300 to 700nm (top row). Photoreceptor output values as a function of the  
 225 same reflectance spectra (bottom row). Violet, blue and green colours represent short, middle and  
 226 long  $\lambda_{\text{max}}$  photoreceptor types. Vertical lines represent midpoint of maximum  $\Delta S$ -values. For  
 227 comparison, scales are the same as in Figure 4.

228
